RESEARCH ARTICLE

# Zoospore exudates from *Phytophthora nicotianae* affect immune responses in *Arabidopsis*

Ping Kong<sup>1\*</sup>, John M. McDowell<sup>2</sup>, Chuanxue Hong<sup>1,2</sup>

**1** Hampton Roads Agricultural Research and Extension Center, Virginia Tech, Virginia Beach, Virginia, United States of America, **2** Department of Plant Pathology, Physiology and Weed Science, Virginia Tech, Blacksburg, Virginia, United States of America

\* [pkong@vt.edu](mailto:pkong@vt.edu)

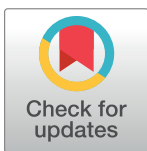

**OPEN ACCESS**

**Citation:** Kong P, McDowell JM, Hong C (2017) Zoospore exudates from *Phytophthora nicotianae* affect immune responses in *Arabidopsis*. PLoS ONE 12(6): e0180523. <https://doi.org/10.1371/journal.pone.0180523>

**Editor:** Zonghua Wang, Fujian Agriculture and Forestry University, CHINA

**Received:** January 9, 2017

**Accepted:** June 17, 2017

**Published:** June 29, 2017

**Copyright:** © 2017 Kong et al. This is an open access article distributed under the terms of the [Creative Commons Attribution License](https://creativecommons.org/licenses/by/4.0/), which permits unrestricted use, distribution, and reproduction in any medium, provided the original author and source are credited.

**Data Availability Statement:** All relevant data are within the paper and its Supporting Information files.

**Funding:** This study was supported in part by the Specialty Crop Research Initiative (SCRI, Agreement #: 201051181-21140) and the Hatch Program of the United States USDA National Institute of Food and Agriculture, and the Virginia Agricultural Experiment Station to CH. There was no additional external funding received for this study. The funders had no role in study design,

## Abstract

Zoospore exudates play important roles in promoting zoospore communication, homing and germination during plant infection by *Phytophthora*. However, it is not clear whether exudates affect plant immunity. Zoospore-free fluid (ZFF) and zoospores of *P. nicotianae* were investigated comparatively for effects on resistance of *Arabidopsis thaliana* Col-0 and mutants that affect signaling mediated by salicylic acid (SA) and jasmonic acid (JA): *eds16* (enhanced disease susceptibility16), *pad4* (phytoalexin deficient4), and *npr1* (nonexpressor of pathogenesis-related genes1). Col-0 attracted more zoospores and had severe tissue damage when flooded with a zoospore suspension in ZFF. Mutants treated with ZFF alone developed disease symptoms similar to those inoculated with zoospores and requirements of EDS16 and PAD4 for plant responses to zoospores and the exudates was apparent. Zoospore and ZFFs also induced expression of the *PR1* and *PDF1.2* marker genes for defense regulated by SA and JA, respectively. However, ZFF affected more JA defense signaling, down regulating *PR1* when SA signaling or synthesis is deficient, which may be responsible for *Arabidopsis* mutant plants more susceptible to infection by high concentration of *P. nicotianae* zoospores. These results suggest that zoospore exudates can function as virulence factors and inducers of plant immune responses during plant infection by *Phytophthora*.

## Introduction

*Phytophthora* species use a variety of strategies to infect plants, causing severe losses for food crops and ornamental plant production, as well as damage in forest ecosystems [1]. For example, *P. nicotianae* (syn. *P. parasitica*) can colonize foliar structures and roots of over 200 plant species including *Arabidopsis* [1–4]. This pathogen can use exudates from zoospores and bacteria to promote successful infection [3, 5, 6]. The exudates from zoospores of *Phytophthora* and *Pythium*, termed zoospore-free fluids (ZFF), function as quorum-sensing signals promoting zoospore homing and triggering infection by single zoospores [3, 5, 7]. However, it is not clear whether ZFF also affects plant immunity.

data collection and analysis, decision to publish, or preparation of the manuscript.

**Competing interests:** The authors have declared that no competing interests exist.

Plant immune responses are activated by two major classes of surveillance proteins: transmembrane pattern recognition receptors (PRRs) and plant nucleotide-binding, leucine-rich repeat (NLR) proteins [8, 9]. PRRs recognize conserved, pathogen-associated molecular patterns (PAMPs) to activate PAMP-triggered immunity (PTI). NLR proteins recognize pathogen effectors to activate effector-triggered immunity (ETI). Activation of PTI and ETI in plants involves a complex signaling network regulated by small plant hormone molecules such as salicylic acid (SA), jasmonic acid (JA) and ethylene (ET), as well as proteins responsible for production and signal transduction of these hormones [10, 11].

*Arabidopsis thaliana* is a popular model plant for studying plant immunity and there are many loss-of-function *Arabidopsis* mutants available for dissection of immune responses to different pathogens. For example, *eds 16-1* contains a loss of function mutation in a gene encoding isochorismate synthase, a major enzyme in the biosynthesis [12] of salicylic acid (SA), which plays a central role in immune responses to biotrophic pathogens. Similarly, *pad4-1* is a mutant of the Phytoalexin Deficiency 4 gene that encodes a lipase-like protein operating upstream of SA accumulation to regulate various aspects of immune responses, including production of the anti-microbial phytoalexin camalexin, and SA-dependent immune signaling, and other sectors of the immune response network [13–16]. *Npr-1* is a mutant of Nonexpresser of Pathogenesis-Related Protein 1 (NPR1), encoding a receptor of SA and a central regulatory protein of SA-mediated responses in plant defense [11, 17, 18]. Another useful tool in *Arabidopsis* is marker genes that are assayed to report activation of specific defense signaling pathways. For example, *PR1* [19] and *PDF1.2* [20] are widely used to determine activation of pathways mediated by SA and JA/ET signaling, respectively.

Current models of defense signaling indicate that SA and JA/ET pathways are activated by pathogens with different lifestyles [21]. For example, activation of JA/ET signaling is often associated with the defense against necrotrophic such as *Pythium* species [22–25]. In contrast, activation of SA signaling is a key component of defense against biotrophs such as *Hyaloperonospora arabidopsidis* [26–28]. The SA and JA/ET pathways are mutually antagonistic in *Arabidopsis*, such that activation of one pathway triggers repression of the other. It is believed that this mutual antagonism provides for adaptive tailoring so that the most effective defense is deployed against the type of pathogen that is invading the plant [29]. However, it is unclear how these pathways are regulated during infection by hemi-biotrophic pathogens that colonize the plants as biotrophs and later activate a necrotrophic phase.

Many *Arabidopsis*-based pathosystems have been studied for plant defense mechanisms against oomycetes of importance, including *Hyaloperonospora arabidopsidis*, *Phytophthora capsici*, *P. cinammomi*, *P. infestans*, *P. nicotianae*, *P. porri*, *P. sojae*, and *Pythium irregulare* [22, 28, 30–34]. However, only *H. arabidopsidis* is a natural pathogen of *Arabidopsis*, while *P. porri* is a natural pathogen of *Brassica* plants related to *Arabidopsis*. Most of other oomycetes either cause a hypersensitive response in *Arabidopsis* under controlled conditions or have a restricted host range [2, 24, 31, 35–38]. In contrast, *P. nicotianae* has a wide host range causing diseases of over 200 plant species and can infect *Arabidopsis* at a high inoculum concentration in the laboratory [2, 3]. Moreover, *P. nicotianae* is relatively amenable to biological, molecular and genetic approaches. Thus, the *Arabidopsis*—*P. nicotianae* phyto-pathosystem is considered as a useful model for studying interaction between plants and oomycete pathogens.

In this study, we compared how *P. nicotianae* zoospores and ZFF interacted with *A. thaliana* Col-0 and mutants in SA signaling and biosynthesis. While previous studies focused on roles of ZFF in *Phytophthora* quorum sensing and behaviors, this study focused on the impact of zoospore exudates on plant immune responses during infection by *P. nicotianae*.

## Materials and methods

### Pathogen growth conditions and ZFF preparation

*Phytophthora nicotianae* isolate 1B11 from annual vinca (*Catharanthus roseus* cv. 'Little Bright Eye') was used in this study. Growth, maintenance and preparation of zoospore-free fluid (ZFF) of the organism followed previous protocols unless otherwise stated [3, 5, 39]. Specifically, high concentrations of zoospore suspensions were made by growing mycelium plugs in 10% clear V8 juice broth at 23°C for one week in the dark followed by inducing sporangia under the lights for two days, rinsing and flooding of the grown mycelium/sporangium mats with cold sterilized distilled water (SDW) to remove the nutrient residues from media and to release zoospores, respectively. Zoospore suspensions were measured for concentrations with a hemocytometer under a microscope. To make ZFF, suspensions were filtered through a 0.2 µm filter after vortexed for 5 min to allow zoospore to encyst and release chemicals into the solution. The filtrate was referred as ZFF, and its concentration was determined by the concentration of zoospores suspension used. In this study, all ZFF were from zoospore suspensions at 10<sup>5</sup> /ml or higher.

### Plant growth conditions

*Arabidopsis thaliana* (Col-0) and mutants, *eds16-1*, *npr1-1* and *pad4-*, were seeded in Metro Mix 360 top-layered with Metro Mix 200 (Scotts, Marysville, OH) and grown for 5 weeks in a growth chamber at 25°C with a 14/10 h light/dark cycle. All plants were fertilized in the third and fourth week with 20-20-20 liquid fertilizer (Scotts, Marysville, OH). Four- to 6-week-old plants were used in assays including microscopy, disease assessment and gene expression.

### Examination of effects of ZFF on plant response to zoospores

Detached cauline leaves from 5-week old Col-0 plants were placed individually in the wells of a 24-well plate and flooded with 250 µl of ZFF or sterile distilled water (SDW), each containing zoospores at a concentration of 1,600/ml. The plate was kept in the dark overnight at 23°C, and then transferred to growth chamber. Leaves in the wells were examined for zoospore aggregation and plant tissue damage under a Nikon Labophot-2 or Olympus 1X71 inverted microscope after 5, 24, 48 and 120 h incubation. Each treatment (ZFF or SDW) included three replicated wells.

### Assessment of effects of ZFF on disease development

Plants of four to five weeks were removed from MetroMix, cleaned in tap water and rinsed with SDW before treatment. Six plants per genotype were flooded with 20 ml ZFF or controls SDW and zoospore suspension at 200,000/ml, respectively in a 40-ml beaker and placed in moisture containers. Plants were kept at 23°C in the dark for 16 h and then placed in a growth chamber under the plant growth conditions. Disease was rated by the percentage of symptomatic leaves in total leaves at 88 h after treatment. Yellowing and rotting symptoms were rated separately. Each experiment included four biological replicates and was repeated once.

### Analysis of effects of ZFF on plant gene expression

ZFF was also assessed for activation of SA and JA signaling mediated defense marker genes *PR1* and *PDF1.2* in a time course experiment. The experiment was set up as that for disease assessment and included three replicates for each treatment: ZFF, SDW or zoospores at 200,000/ml. At 4, 8, 16, 24, 48 and 72 hours after treatment, one plant was sampled from each replicate. Replicate plants were combined and extracted for RNA with the RNeasy Mini

Kit and RNase-Free DNase Set (Qiagen, Valencia, CA). Equal amounts of RNA were used to perform qRT-PCR in the ABI 7500 Real Time PCR System with the High Capacity cDNA Archive Kit (Applied Biosystems, Foster City, CA), Power SYBR<sup>®</sup> Green PCR Master Mix (Life Technologies, Carlsbad, CA) and primers for target genes *PDF1.2* [40] and *PR1* [41] as well as for the endogenous control, reference gene Actin-1 (*ACT1*) [40]. All reactions were run at the 9600 mode Emulation with 50°C for 2 min at first stage, 95°C for 10 min at second stage followed by 40 cycles of 15 sec at 95°C, 1 min at 60°C at the third stage. Each sample had three PCR runs for each of the genes. The mean value of Ct (threshold cycle) of each gene in a sample of the PCRs were generated with Relative Quantification Study in the software SDS v.1.3.1 (Applied Biosystems, Foster City, CA). Target gene expression was measured with Relative transcription levels (RQ) which was calculated using the formula  $2^{-dCt}$  after Ct of target gene was normalized with that of the reference gene *ACT1* in the same sample ( $dCt_{target} = Ct_{target} - Ct_{ACT1}$ ).

### Statistical analysis

Standard errors were calculated from standard deviation and number of replicates with Microsoft Excel. T-test at equal variances in Excel was used for evaluating statistical significance between the treatments. *P* values <0.05 were considered significant.

## Results

### Effect of zoospore exudates on *Arabidopsis* infection by *Phytophthora nicotianae*

Detached cauline leaves of Col-0 were flooded in ZFF containing zoospores at 1, 600/ml for 5 h (Fig 1A). At this time point, zoospores aggregated at the base of trichome. The affected trichomes became macerated 24 h after the exposure. Meanwhile, there was zoospore germination and mycelium growth on and in plant tissues (Fig 1C). Leaf tissue damage and substance discharge from trichomes was evident at 48 hours after the treatment (Fig 1E). Leaf yellowing was also evident at this time point. On the 5th day of the treatment, rotting became apparent and further tissue damage and production of numerous sporangia was observed under the microscope (Fig 1G). Same effect was found for ZFF from zoospore suspensions at  $\geq 10^5$ /ml as used in this study. In contrast, there was sparse zoospore attachment to leaves treated with SDW (Fig 1B). SDW-treated leaves/sustained little damage in trichomes or leaf tissue and supported limited hyphal growth with no sporangia production (Fig 1B, 1D, 1F and 1H). These results indicate that ZFF promoted susceptibility of *Arabidopsis* plants to *P. nicotianae*.

### Effect of zoospore exudates on *Arabidopsis* defense components

To better understand why plants become more susceptible to zoospores with addition of ZFF, *Arabidopsis* Col-0 and mutant plants *eds16-1*; *npr1-1* and *pad4-1* (all in the Col-0 background) were treated with a zoospore suspension at 200,000/ml; ZFF alone, or a SDW control (Fig 2, Table 1). Visual symptoms were compared in response to all three treatments. Zoospore treatment induced visible symptoms in >40% of leaves from Col-0. Contrastingly, ZFF treatment induced only a minor increase in symptoms compared to water-treated control. Interestingly, *eds16-1* plants developed severe leaf yellowing and rotting, compared to Col-0, after treatment with ZFF (Fig 2B). Similar symptoms were displayed after inoculation with zoospores. The *pad4-1* mutant also displayed slightly enhanced symptoms, compared to wild-type Col-0, after treatment with ZFF or zoospore inoculum. Interestingly, responses to ZFF and zoospores were slightly attenuated in *npr1-1* compared to Col-0. These results indicate that a deficiency in SA



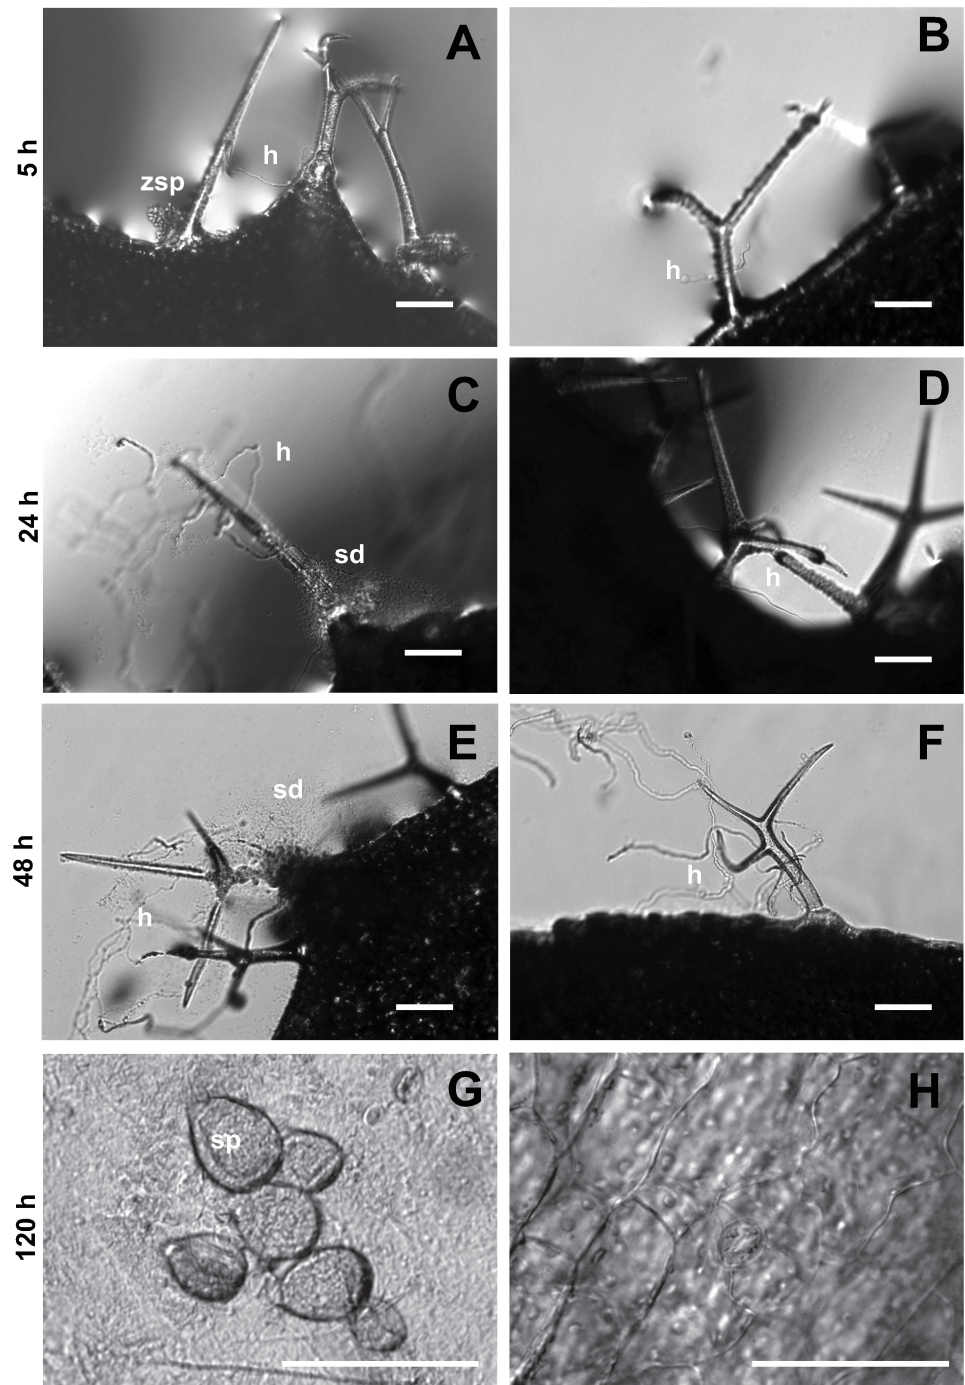

**Fig 1. Microscopy of effects of zoospore free fluid (ZFF) on *Arabidopsis* (Col-0) responses to *Phytophthora nicotianae* zoospores.** Individual cauline leaves were flooded in ZFF (A, C, E, and G) or sterile distilled water (SDW) (B, D, F and H) containing zoospores at 1,600 /ml and observed at different exposure time. Bars = 50  $\mu$ m. Letters: h = hypha or hyphae, sd = substance discharge from plant tissues, sp = sporangia, zsp = zoospores.

<https://doi.org/10.1371/journal.pone.0180523.g001>

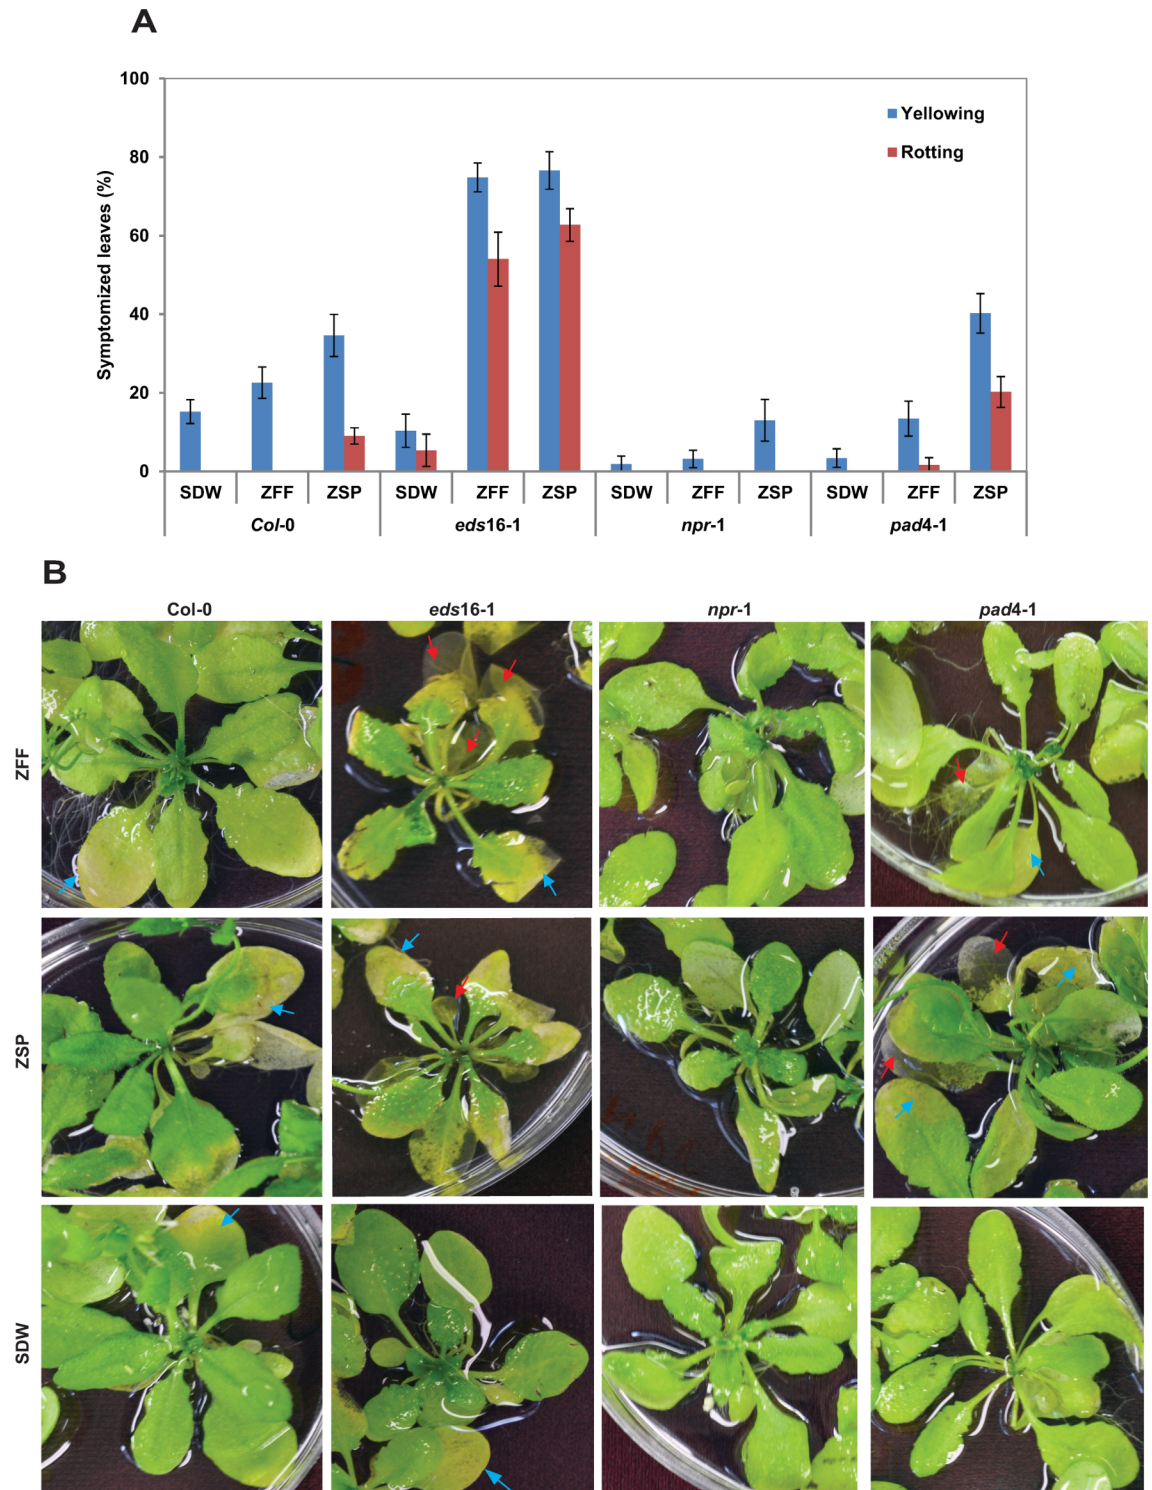

**Fig 2. Comparison of effects on disease symptom development of *Arabidopsis* Col-0 and its mutant *eds16-1*, *npr1-1* and *pad4-1* between zoospore free fluid (ZFF) and zoospores (ZSP) of *Phytophthora nicotianae*.** Plants were treated with ZFF alone or zoospore suspension at 200,000/ml and recorded symptoms after 88 h at 23° C. A. Percentage of leaves displaying yellowing or rotting after treatment. Each column is a mean of 6 plants; bars depict standard error. Similar results were observed in three independent replicates. B. Images of the plants after treatment. Typical yellowing or rotting is indicated with blue and red arrows, respectively.

<https://doi.org/10.1371/journal.pone.0180523.g002>

**Table 1. Difference of effects between zoospore free fluid (ZFF) and zoospores (ZSP) of *P. nicotianae* on symptom production of *Arabidopsis thaliana* plants.**

| Plant          | <i>P</i> value between treatments <sup>x</sup> |         |         |         |                 |         |
|----------------|------------------------------------------------|---------|---------|---------|-----------------|---------|
|                | Yellowing                                      |         |         | Rotting |                 |         |
|                | ZFF:ZSP                                        | ZFF:SDW | ZSP:SDW | ZFF:ZSP | ZFF:SDW         | ZSP:SDW |
| Col-0          | 0.041                                          | 0.004   | 1.597   | 0.003   | NA <sup>y</sup> | 0.003   |
| <i>eds16-1</i> | 0.376                                          | <0.001  | <0.001  | 0.134   | <0.001          | <0.001  |
| <i>npr1-1</i>  | 0.046                                          | 0.029   | 0.319   | NA      | NA              | NA      |
| <i>pad4-1</i>  | <0.001                                         | 0.027   | <0.001  | <0.001  | 0.170           | <0.001  |

<sup>x</sup> *P* value is determined with t-Test with equal variance in Excel at  $\alpha = 0.05$ . A difference at  $P \geq 0.05$  is not significant.

<sup>y</sup> NA = not applicable.

<https://doi.org/10.1371/journal.pone.0180523.t001>

biosynthesis/signaling rendered *Arabidopsis* more susceptible to *P. nicotianae*, and that ZFF treatment triggered disease-like symptoms in an SA-deficient mutant.

### Effect of zoospore exudates on regulation of SA and JA signaling in the plants

To determine how ZFF may affect defense signaling pathways, expression of SA and JA marker gene *PR1* and *PDF1.2* was examined in wild type and mutant plants treated with zoospores, ZFF, or SDW. In Col-0, both genes were induced by ZFF and zoospores although the effect of ZFF was weaker than zoospores. ZFF treatment appeared to have a stronger effect on *PDF1.2* expression than on *PR1* expression, compared to the water treatment (Fig 3A). *eds16-1* plants displayed substantially different patterns of transcript accumulation, compared to Col-0: In zoospore- and ZFF-treated plants, expression of *PDF1.2* was much lower at 4 and 8 hours after treatment, compared to Col-0, but then increased to a level higher than Col-0 by 72 hours. Zoospore-responsive expression of *PR-1* was lower than Col-0 in *eds16-1* at early time points, but increased at later time points. As in Col-0, ZFF effect on both marker genes in *eds16-1* was roughly equivalent to that of water. The *npr1-1* and *pad4-1* mutants were similar to each other and to *eds16-1*: Expression of *PDF1.2* was equivalent or somewhat higher to Col-0, with zoospore treatment inducing stronger expression than ZFF or water. *PR-1* expression in mutants was much lower than in Col-0 in response to all treatments although zoospore treatment induced a much stronger response in the late time.

### Discussion

Zoospore exudates of *Phytophthora* have been shown as chemical signals for *Phytophthora* quorum sensing leading to zoospore aggregation, homing and infection initiation as well as communications between zoosporic oomycetes and with bacteria [3, 5, 7, 39, 42]. This study reveals new roles of zoospore exudates as virulence factors of the pathogen and inducers of plant immunity, contributing to the success of plant infection by *Phytophthora* zoospores.

Most importantly, zoospore pre-treatment with ZFF rendered *Arabidopsis* plants more susceptible to infection by *P. nicotianae* zoospores (Fig 1). Additionally, ZFF treatment induced disease-like symptoms of yellowing and rotting that were similar to those induced by treatment with zoospores. Finally, ZFF treatment influenced expression of marker genes for both SA- and JA-dependent immune responses. These data indicate that zoospore exudates can affect the function of the host immune system, in addition to mediating intra- and interspecies chemical communication, promoting zoospore homing and plant infection described in previous studies. The ability of ZFF to promote disease-like symptoms, independent of pathogen



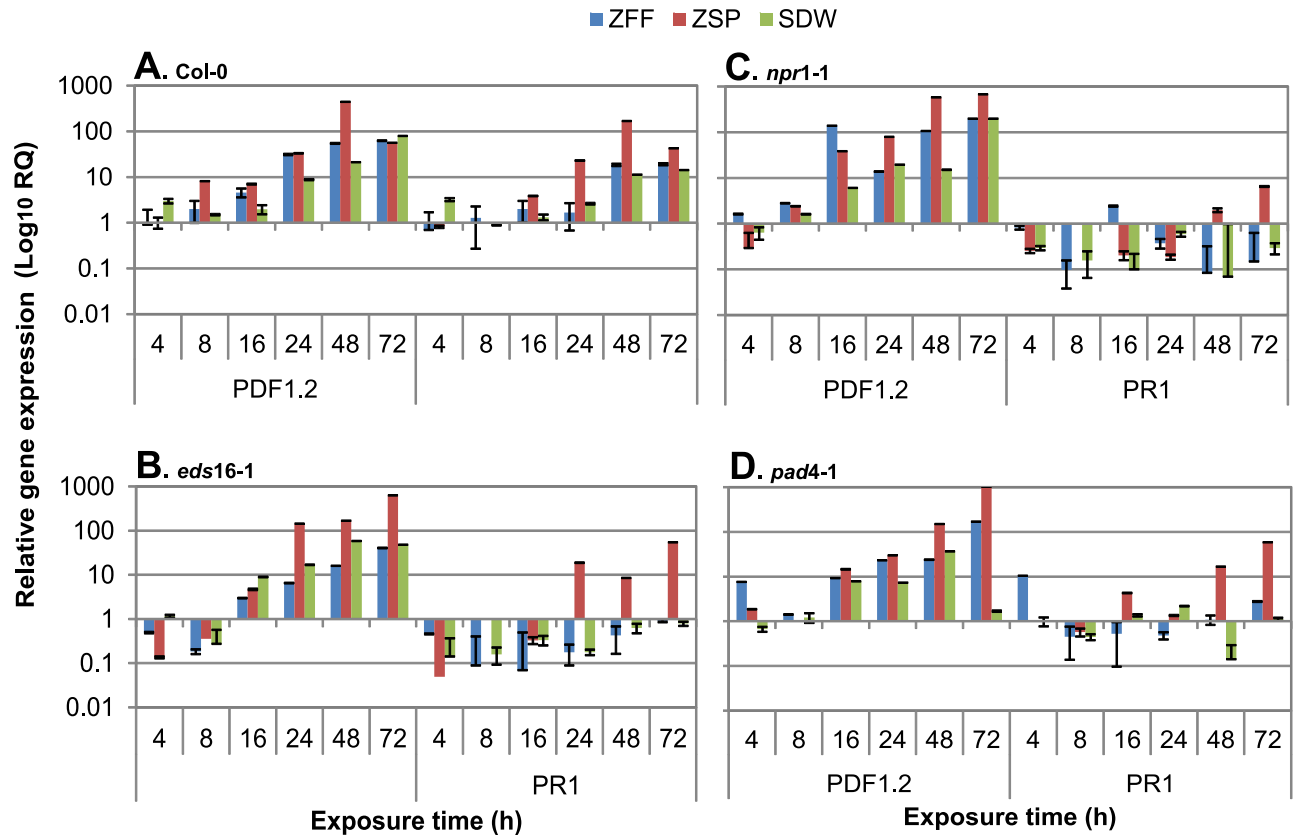

**Fig 3. Effects of zoospore free fluid (ZFF) of *Phytophthora nicotianae* on expression of salicylic acid (SA)—and jasmonic acid (JA)—associated defense genes in *Arabidopsis* Col-0 and its mutants.** Plants were flooded with ZFF, SDW or zoospore suspension at 200,000/ml (ZSP) and extracted for RNA at 4, 8, 16, 24 and 48 h after treatment. *PR1*, *PDF1.2* expression was analyzed with QRT-PCR in a real time PCR system and the transcript levels or mean value of Ct (threshold cycle) were normalized with reference gene *Actin-1* in the same samples. The graph depicts the relative expression of the genes in treated plants. Each column is a mean of three PCR replicates from one of two biological experiments with similar results. Bars depict standard error from the replicates.

<https://doi.org/10.1371/journal.pone.0180523.g003>

colonization, is particularly intriguing. We propose that the chlorosis and rotting are due to one or more toxins present in ZFF. It would be of great interest to identify the precise compounds in ZFF that induces these symptoms. It will also be interesting to determine if the toxins promote immune activation as part of the necrotrophic phase of plant colonization.

Another interesting aspect is that plant responses to zoospores and ZFF treatment appear linked to SA signaling, based on differential responses observed during treatment of mutants that disable SA biosynthesis (*eds16-1*) or signaling (*pad4-1*, *npr1-1*). When SA biosynthesis is disabled (*eds16-1*), the disease symptoms triggered by zoospores or ZFF are substantially enhanced. A similar but weaker enhancement was observed in the *pad4-1* mutant. These data indicate that SA signaling plays a role in resistance to pathogen colonization (zoospores) and/or toxicity mediated by ZFF. Because *pad4-1* was less responsive to ZFF, PAD4 may partially involve the resistance to the toxins in zoospore exudates despite the fact that it can provide amplified defense through phytoalexin camalexin production or interaction with EDS [14, 15]. Interestingly, *npr1-1* mutants displayed reduced symptoms to both treatments, suggesting that the resistance to *P. nicotianae* and ZFF-induced disease symptoms occurs through a mechanism that requires SA and PAD4, but operates independently of NPR1. Although *npr1-1* has been associated with SA signaling in many interactions [43, 44] including the oomycete

*Hyaloperonospora arabidopsidis* [11], genetic studies have provided evidence for immune responses that are SA-dependent but to not require NPR1 [45–48].

The responsiveness of *PR-1* and *PDF1.2* to *P. nicotianae* zoospores indicates that SA and JA pathways are responsive, in *Arabidopsis*, to *Phytophthora* pathogens [2, 31]. Interestingly, ZFF treatment had a more pronounced effect on *PDF1.2* expression than on *PR-1* expression, suggesting that a component of ZFF was sufficient to trigger JA-dependent immune responses (Fig 3). It is conceivable that ZFF may be more involved in necrotrophic activities, or that activation of JA defenses may function to suppress SA defenses during biotrophic growth. This is apparent when SA function is attenuated; ZFF induced yellowing and rotting on the treated plants while induced no or very low *PR-1* response in the mutants, and high concentration of zoospores invoked much more potent responses on defense signaling and symptoms (Figs 2 and 3B–3D). This regulatory feature of ZFF on plant defense may explain why addition of ZFF in a low concentration of zoospore inoculum which is technically equivalent to high concentration of zoospores in the term of the impact on quorum sensing mediated infection [3], enhanced susceptibility of plants (Fig 1). Similar complex responses have been well documented for necrotrophs with a broad host range which can produce diverse PAMPs that activate plant immune responses as well as virulence factors that suppress immune responses [49, 50]. Understanding the exact molecular mechanisms that drive these responses will be a significant step towards understanding the basis of resistance and susceptibility to necrotrophic and hemi-biotrophic pathogens that cause substantial crop loss.

Using an external control is uncommon in a time course study on plant–pathogen interaction with qRT-PCR. In this study, we used SDW as the control to compare zoospore inocula and exudates at the same condition. However, SDW treatment caused responses of SA and JA defense signaling marker gene which sometimes was equivalent to those triggered by zoospores or ZFF, indicating that flooding may induce similar SA or JA responses. Net effects of zoospores and ZFF can be obtained by calibrating transcripts of these target genes from the same sampling time in the individual treatments with transcripts of the control. Alternatively, calibration may be done with samples at zero exposure time. However, reduction of such background may cover up real effects of zoospore inoculum or exudates on plant defense which gave rise to visual symptoms distinct from that of SDW (Fig 2). Nevertheless, to include external control in qRT-PCR for analyses of plant defense gene expression, it is warranted to use SA and JA marker genes that are not responsive to flood or to develop alternative feasible inoculation or treatment methods.

## Supporting information

**S1 Table. Ct (threshold cycle) and RQ values of tested genes in qRT-PCR.** Data were generated in ABI 7500 Real Time PCR System and computed with Relative Quantification Study in the software SDS v.1.3.1.

(XLSX)

**S2 Table. Rated *Arabidopsis* leaves that showed yellowing or rotting in treated plants after 88 h treatment at 23 °C with ZFF and controls of sterile distilled water (SDW) and high concentration of zoospores at 200,000/ml.**

(XLSX)

## Acknowledgments

This study was supported in part by the Specialty Crop Research Initiative (SCRI, Agreement #: 2010-51181-21140) and the Hatch Program of the United States USDA National Institute of Food and Agriculture, and the Virginia Agricultural Experiment Station.



## Author Contributions

**Conceptualization:** Ping Kong, John M. McDowell, Chuanxue Hong.

**Data curation:** Ping Kong.

**Formal analysis:** Ping Kong, John M. McDowell.

**Funding acquisition:** Chuanxue Hong.

**Investigation:** Ping Kong.

**Methodology:** Ping Kong, John M. McDowell.

**Project administration:** Chuanxue Hong.

**Resources:** John M. McDowell, Chuanxue Hong.

**Software:** Chuanxue Hong.

**Supervision:** John M. McDowell, Chuanxue Hong.

**Validation:** Ping Kong, John M. McDowell, Chuanxue Hong.

**Visualization:** Ping Kong, John M. McDowell, Chuanxue Hong.

**Writing – original draft:** Ping Kong.

**Writing – review & editing:** Ping Kong, John M. McDowell, Chuanxue Hong.

## References

1. Erwin DC, Ribeiro OK. *Phytophthora Diseases Worldwide*. St Paul, MN, USA: APS Press; 1996. 562 p.
2. Attard A, Gourgues M, Callemeyn-Torre N, Keller H. The immediate activation of defense responses in *Arabidopsis* roots is not sufficient to prevent *Phytophthora parasitica* infection. *New Phytol*. 2010; 187(2):449–60. <https://doi.org/10.1111/j.1469-8137.2010.03272.x> PMID: 20456058
3. Kong P, Hong CX. Zoospore density dependent behaviors of *Phytophthora nicotianae* are autoregulated by extracellular products. *Phytopathology*. 2010; 100(7):632–7. <https://doi.org/10.1094/PHYTO-100-7-0632> PMID: 20528180
4. Raftoyannis Y, Dick MW. Zoospore encystment and pathogenicity of *Phytophthora* and *Pythium* species on plant roots. *Microbiol Res*. 2006; 161(1):1–8. <https://doi.org/10.1016/j.micres.2005.04.003> PMID: 16338584
5. Kong P, Tyler BM, Richardson PA, Lee BWK, Zhou ZHS, Hong CX. Zoospore interspecific signaling promotes plant infection by *Phytophthora*. *BMC Microbiol*. 2010; 10:e313. Published online. 1186/1471-2180-10-313.
6. Kong P, Hong C. Soil bacteria as sources of virulence signal providers promoting plant infection by *Phytophthora* pathogens. *Scientific Reports*. 2016; 6:33239. <https://doi.org/10.1038/srep33239> <http://www.nature.com/articles/srep33239#supplementary-information>. PMID: 27616267
7. Jiang H, Hao J, Bishop KD. Compounds from zoospore exudate serve as a signal to promote zoospore germination and infection of *Phytophthora erythroseptica*. *Phytopathology*. 2014; 104(Suppl. 3):S3.55.
8. Jones JDG, Dangl JL. The plant immune system. *Nature*. 2006; 444(7117):323–9. <https://doi.org/10.1038/nature05286> PMID: 17108957
9. Chisholm ST, Coaker G, Day B, Staskawicz BJ. Host-microbe interactions: Shaping the evolution of the plant immune response. *Cell*. 2006; 124(4):803–14. <https://doi.org/10.1016/j.cell.2006.02.008> PMID: 16497589
10. Katagiri F, Tsuda K. Understanding the Plant Immune System. *Mol Plant-Microbe Interact*. 2010; 23(12):1531–6. <https://doi.org/10.1094/MPMI-04-10-0099> PMID: 20653410
11. McDowell JM, Cuzick A, Can C, Beynon J, Dangl JL, Holub EB. Downy mildew (*Peronospora parasitica*) resistance genes in *Arabidopsis* vary in functional requirements for NDR1, EDS1, NPR1 and salicylic acid accumulation. *Plant J*. 2000; 22(6):523–9. PMID: 10886772

12. Wildermuth MC, Dewdney J, Wu G, Ausubel FM. Isochorismate synthase is required to synthesize salicylic acid for plant defence. *Nature*. 2001; 414(6863):562–5. Epub 2001/12/06. <https://doi.org/10.1038/35107108> PMID: 11734859.
13. Aarts N, Metz M, Holub E, Staskawicz BJ, Daniels MJ, Parker JE. Different requirements for EDS1 and NDR1 by disease resistance genes define at least two R gene-mediated signaling pathways in *Arabidopsis*. *Proceedings of the National Academy of Sciences*. 1998; 95(17):10306–11. <https://doi.org/10.1073/pnas.95.17.10306>
14. Glazebrook J, Zook M, Mert F, Kagan I, Rogers EE, Crute IR, et al. Phytoalexin-Deficient Mutants of *Arabidopsis* Reveal That PAD4 Encodes a Regulatory Factor and That Four PAD Genes Contribute to Downy Mildew Resistance. *Genetics*. 1997; 146(1):381–92. PMID: 9136026
15. Feys BJ, Moisan LJ, Newman MA, Parker JE. Direct interaction between the *Arabidopsis* disease resistance signaling proteins, EDS1 and PAD4. *EMBO J*. 2001; 20(19):5400–11. <https://doi.org/10.1093/emboj/20.19.5400> PMID: 11574472
16. Wiermer M, Feys BJ, Parker JE. Plant immunity: the EDS1 regulatory node. *Curr Opin Plant Biol*. 2005; 8(4):383–9. <https://doi.org/10.1016/j.pbi.2005.05.010> PMID: 15939664
17. Cao H, Glazebrook J, Clarke JD, Volko S, Dong X. The *Arabidopsis* NPR1 gene that controls systemic acquired resistance encodes a novel protein containing ankyrin repeats. *Cell*. 1997; 88(1):57–63. PMID: 9019406
18. Wu Y, Zhang D, Chu Jee Y, Boyle P, Wang Y, Brindle Ian D, et al. The *Arabidopsis* NPR1 Protein Is a Receptor for the Plant Defense Hormone Salicylic Acid. *Cell Reports*. 2012; 1(6):639–47. <http://dx.doi.org/10.1016/j.celrep.2012.05.008>. PMID: 22813739
19. Ward ER, Uknes SJ, Williams SC, Dincher SS, Wiederhold DL, Alexander DC, et al. Coordinate gene activity in response to agents that induce systemic acquired-resistance. *Plant Cell*. 1991; 3(10):1085–94. <https://doi.org/10.1105/tpc.3.10.1085> PMID: 12324583
20. Penninckx IAMA, Thomma BPHJ, Buchala A, Metraux J-P, Broekaert WF. Concomitant activation of jasmonate and ethylene response pathways is required for induction of a plant defensin gene in *Arabidopsis*. *Plant Cell*. 1998; 10(12):2103–14. <https://doi.org/10.1105/tpc.10.12.2103> PMID: 9836748
21. Glazebrook J. Contrasting Mechanisms of Defense Against Biotrophic and Necrotrophic Pathogens. *Annu Rev Phytopathol*. 2005; 43(1):205–27. <https://doi.org/10.1146/annurev.phyto.43.040204.135923> PMID: 16078883.
22. Staswick PE, Yuen GY, Lehman CC. Jasmonate signaling mutants of *Arabidopsis* are susceptible to the soil fungus *Pythium irregulare*. *Plant J*. 1998; 15(6):747–54. PMID: 9807813
23. Vijayan P, Shockey J, Levesque CA, Cook RJ, Browse J. A role for jasmonate in pathogen defense of *Arabidopsis*. *Proc Natl Acad Sci U S A*. 1998; 95(12):7209–14. PMID: 9618564
24. Huitema E, Vleeshouwers V, Francis DM, Kamoun S. Active defence responses associated with non-host resistance of *Arabidopsis thaliana* to the oomycete pathogen *Phytophthora infestans*. *Mol Plant Pathol*. 2003; 4(6):487–500. <https://doi.org/10.1046/j.1364-3703.2003.00195.x> PMID: 20569408
25. Rookes JE, Wright ML, Cahill DM. Elucidation of defence responses and signalling pathways induced in *Arabidopsis thaliana* following challenge with *Phytophthora cinnamomi*. *Physiol Mol Plant Pathol*. 2008; 72(4–6):151–61. <https://doi.org/10.1016/j.pmp.2008.08.005>
26. Thomma BPHJ, Eggermont K, Penninckx IAMA, Mauch-Mani B, Vogelsang R, Cammue BPA, et al. Separate jasmonate-dependent and salicylate-dependent defense-response pathways in *Arabidopsis* are essential for resistance to distinct microbial pathogens. *PNAS*. 1998; 95(25):15107–11. PMID: 9844023
27. Eulgem T, Weigman VJ, Chang HS, McDowell JM, Holub EB, Glazebrook J, et al. Gene expression signatures from three genetically separable resistance gene signaling pathways for downy mildew resistance. *Plant Physiol*. 2004; 135(2):1129–44 <https://doi.org/10.1104/pp.104.040444> PMID: 15181204
28. McDowell JM, Williams SG, Funderburg NT, Eulgem T, Dangl JL. Genetic analysis of developmentally regulated resistance to downy mildew (*Hyaloperonospora parasitica*) in *Arabidopsis thaliana*. *Mol Plant-Microbe Interact*. 2005; 18(11):1226–34. <https://doi.org/10.1094/MPMI-18-1226> PMID: 16353557
29. Spoel SH, Johnson JS, Dong X. Regulation of tradeoffs between plant defenses against pathogens with different lifestyles. *Proceedings of the National Academy of Sciences*. 2007; 104(47):18842–7. <https://doi.org/10.1073/pnas.0708139104> PMID: 17998535
30. Si-Ammour A, Mauch-Mani B, Mauch F. Quantification of induced resistance against *Phytophthora* species expressing GFP as a vital marker: beta-aminobutyric acid but not BTH protects potato and *Arabidopsis* from infection. *Mol Plant Pathol*. 2003; 4(4):237–48. <https://doi.org/10.1046/j.1364-3703.2003.00168.x> PMID: 20569384
31. Roetschi A, Si-Ammour A, Belbahri L, Mauch F, Mauch-Mani B. Characterization of an *Arabidopsis-Phytophthora* pathosystem: resistance requires a functional *PAD2* gene and is independent of salicylic acid, ethylene and jasmonic acid signalling. *Plant J*. 2001; 28(3):293–305. PMID: 11722772

32. Robinson LH, Cahill DM. Ecotypic variation in the response of *Arabidopsis thaliana* to *Phytophthora cinnamomi*. *Aust Plant Pathol*. 2003; 32(1):53–64.
33. McDowell J, Hoff T, Anderson R, Deegan D. Propagation, Storage, and Assays with *Hyaloperonospora arabidopsidis*: A Model Oomycete Pathogen of *Arabidopsis*. In: McDowell JM, editor. *Plant Immunity. Methods in Molecular Biology*. 712: Humana Press; 2011. p. 137–51.
34. Coates ME, Beynon JL. *Hyaloperonospora arabidopsidis* as a Pathogen Model. *Annu Rev Phytopathol*. 2010; 48(1):329–45. <https://doi.org/10.1146/annurev-phyto-080508-094422> PMID: 19400636.
35. Kamoun S, Huitema E, Vleeshouwers V. Resistance to oomycetes: a general role for the hypersensitive response? *Trends Plant Sci*. 1999; 4(5):196–200. PMID: 10322560
36. Vleeshouwers V, van Dooijeweert W, Govers F, Kamoun S, Colon LT. The hypersensitive response is associated with host and nonhost resistance to *Phytophthora infestans*. *Planta*. 2000; 210(6):853–64. <https://doi.org/10.1007/s004250050690> PMID: 10872215
37. Takemoto D, Jones DA, Hardham AR. GFP-tagging of cell components reveals the dynamics of subcellular re-organization in response to infection of *Arabidopsis* by oomycete pathogens. *Plant J*. 2003; 33(4):775–92. PMID: 12609049
38. Kamoun S, Furzer O, Jones JDG, Judelson HS, Ali GS, Dalio RJD, et al. The Top 10 oomycete pathogens in molecular plant pathology. *Mol Plant Pathol*. 2015:n/a–n/a. <https://doi.org/10.1111/mpp.12190> PMID: 25178392
39. Kong P, Lee BWK, Zhou ZS, Hong CX. Zoospore plant pathogens produce bacterial autoinducer-2 that affects *Vibrio harveyi* quorum sensing. *FEMS Microbiol Lett*. 2010; 303(1):55–60. <https://doi.org/10.1111/j.1574-6968.2009.01861.x> PMID: 20002192
40. Penninckx I, Eggermont K, Terras FRG, Thomma B, DeSamblanx GW, Buchala A, et al. Pathogen-induced systemic activation of a plant defensin gene in *Arabidopsis* follows a salicylic acid-independent pathway. *Plant Cell*. 1996; 8(12):2309–23. PMID: 8989885
41. Pieterse CMJ, van Wees SCM, van Pelt JA, Knoester M, Laan R, Gerrits N, et al. A novel signaling pathway controlling induced systemic resistance in *Arabidopsis*. *Plant Cell*. 1998; 10(9):1571–80. PMID: 9724702
42. Kemen E. Microbe–microbe interactions determine oomycete and fungal host colonization. *Curr Opin Plant Biol*. 2014; 20:75–81. <http://dx.doi.org/10.1016/j.pbi.2014.04.005>. PMID: 24845577
43. Shah J, Tsui F, Klessig DF. Characterization of a salicylic acid-insensitive mutant (sai1) of *Arabidopsis thaliana*, identified in a selective screen utilizing the SA-inducible expression of the *tms2* gene. *Mol Plant-Microbe Interact*. 1997; 10(1):69–78. <https://doi.org/10.1094/MPMI.1997.10.1.69> PMID: 9002272
44. Ryals JA, Neuenschwander UH, Willits MG, Molina A, Steiner H-Y, Hunt MD. Systemic Acquired Resistance. *The Plant Cell*. 1996; 8:1809–19. <https://doi.org/10.1105/tpc.8.10.1809> PMID: 12239363
45. Dong HP, Peng JL, Bao ZL, Meng XD, Bonasera JM, Chen GY, et al. Downstream divergence of the ethylene signaling pathway for harpin-stimulated *Arabidopsis* growth and insect defense. *Plant Physiol*. 2004; 136(3):3628–38. <https://doi.org/10.1104/pp.104.048900> PMID: 15516507
46. Clarke JD, Liu YD, Klessig DF, Dong XN. Uncoupling PR gene expression from NPR1 and bacterial resistance: Characterization of the dominant *Arabidopsis* *cpr6-1* mutant. *Plant Cell*. 1998; 10(4):557–69. PMID: 9548982
47. Rairdan GJ, Donofrio NM, Delaney TP. Salicylic acid and NIM1/NPR1-independent gene induction by incompatible *Peronospora parasitica* in *Arabidopsis*. *Mol Plant-Microbe Interact*. 2001; 14(10):1235–46. <https://doi.org/10.1094/MPMI.2001.14.10.1235> PMID: 11605963
48. Rairdan GJ, Delaney TP. Role of Salicylic Acid and NIM1/NPR1 in Race-Specific Resistance in *Arabidopsis*. *Genetics*. 2002; 161(2):803. PMID: 12072475
49. Mengiste T. Plant Immunity to Necrotrophs. *Annu Rev Phytopathol*. 2012; 50(1):267–94. <https://doi.org/10.1146/annurev-phyto-081211-172955> PMID: 22726121.
50. Koeck M, Hardham AR, Dodds PN. The role of effectors of biotrophic and hemibiotrophic fungi in infection. *Cell Microbiol*. 2011; 13(12):1849–57. <https://doi.org/10.1111/j.1462-5822.2011.01665.x> PMID: 21848815
